# Supplementary material for: N-doped carbon encapsulation of ultrafine silicon nanocrystallites for high performance lithium ion storage
Source: Royal Society of Chemistry journal article supplement (doi:10.1039/c3ta13268d), 2013-01-01
Supplement: c3ta13268d.pdf [file c3ta13268d.pdf]

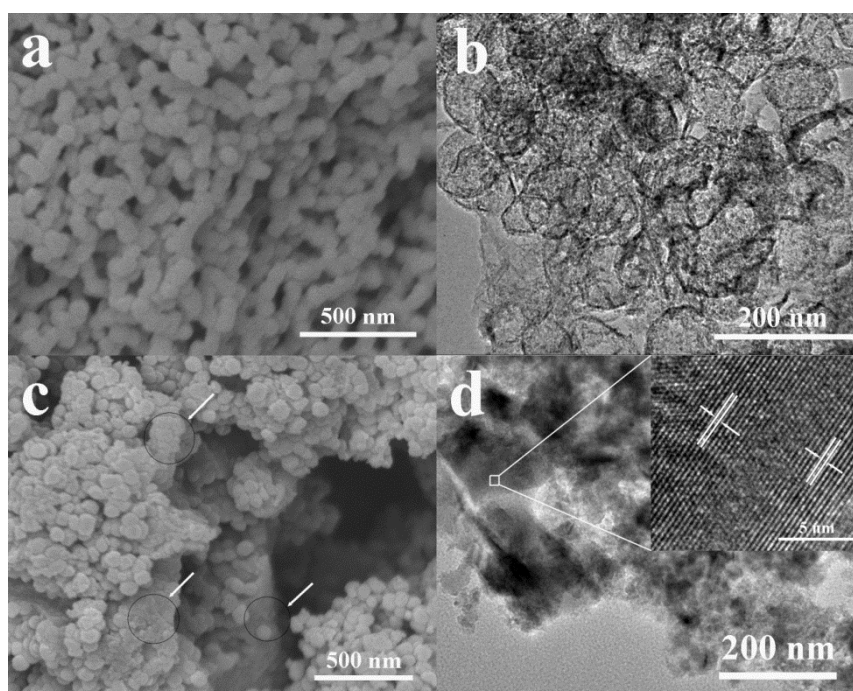

**Fig. S1** (a) FESEM image of IL-C-SiO<sub>2</sub> composite; (b) TEM image of IL-C-Si-HS composite; (c) FESEM image of G-C-SiO<sub>2</sub> composite; (d) TEM image and HRTEM image (inset) of G-C-Si composite.

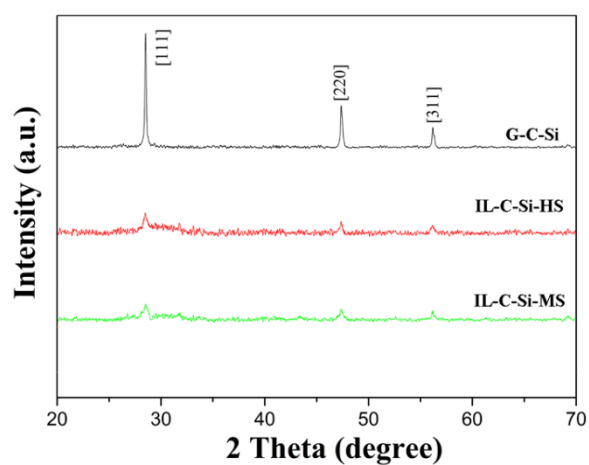

**Fig. S2** XRD patterns of C/Si composites prepared in three different ways.

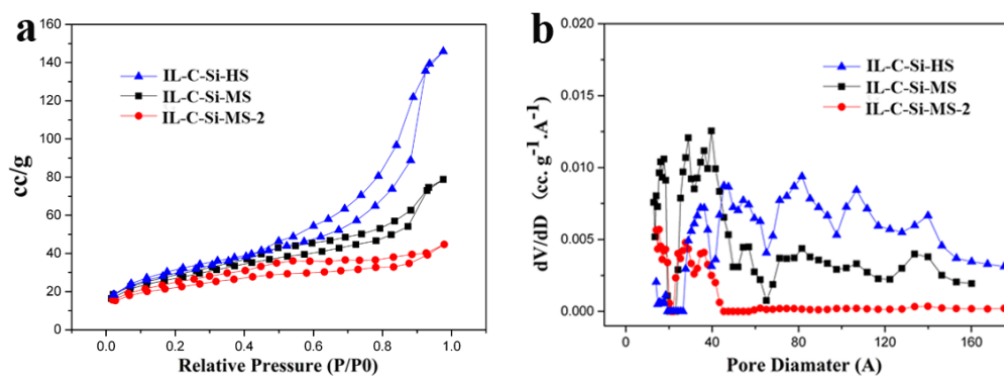

**Fig. S3** (a) Nitrogen sorption isotherms of IL-C-Si-HS, IL-C-Si-MS and IL-C-Si-MS-2; (b) Pore-size distribution plots of IL-C-Si-HS, IL-C-Si-MS and IL-C-Si-MS-2 computed by the DFT method.

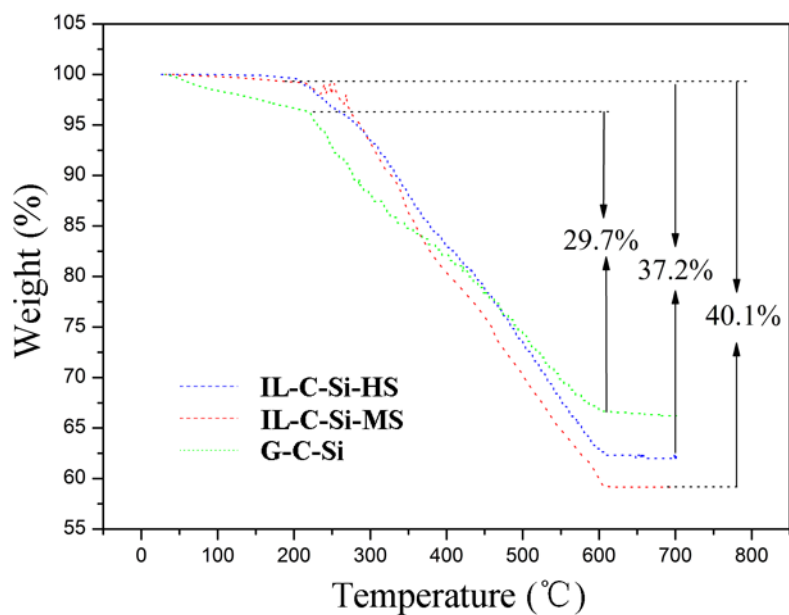

**Fig. S4** TGA curves of different C/Si composites.

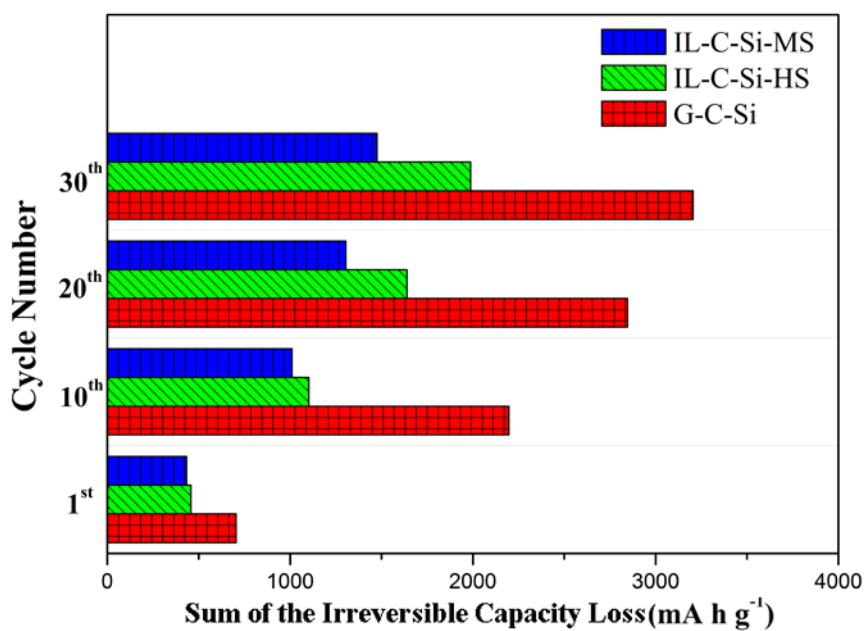

**Fig. S5** Sum of irreversible capacity loss during the cycling of various carbon/silicon electrodes.

**Table. S1** Physical properties from N<sub>2</sub> sorption isotherms for various silica and carbon/silicon products.

| Sample                            | BET Surface Area<br>(m <sup>2</sup> .g <sup>-1</sup> ) | Pore Volume<br>(cc.g <sup>-1</sup> ) | Pore diameter<br>(nm) | Isotherm<br>type | Hysteresis<br>loop type |
|-----------------------------------|--------------------------------------------------------|--------------------------------------|-----------------------|------------------|-------------------------|
| SiO <sub>2</sub><br>nanoparticles | 719.2                                                  | 0.439                                | 1.5-2.5               | I                | H4                      |
| PEI-1-SiO <sub>2</sub>            | 844                                                    | 0.736                                | 2.5-3.5               | IV               | H1                      |
| PEI-2-SiO <sub>2</sub>            | 967                                                    | 0.859                                | 2.5-3.5               | IV               | H1                      |
| IL-C-Si-HS                        | 165                                                    | 0.254                                | 3-14                  | IV               | H1                      |
| IL-C-Si-MS                        | 104                                                    | 0.196                                | 2-6                   | IV               | H1                      |
| IL-C-Si-MS-2                      | 67                                                     | 0.057                                | 2-4                   | II               | H4                      |
